# Supplementary material
Source: MDPI journal article supplement (https://www.mdpi.com/2313-0105/8/6/57)
Supplement: s1 [file s1]

## **Supporting information**

### **Revisiting Polytetrafluorethylene Binder for Solvent-Free Lithium-Ion Battery Anode Fabrication**

Yang Zhang<sup>1, 2</sup>, Frederik Huld<sup>1, 2</sup>, Song Lu<sup>1</sup>, Camilla Jektvik<sup>3</sup>, Fengliu Lou<sup>2\*</sup>,

Zhixin Yu<sup>1\*</sup>

<sup>1</sup>Department of Energy and Petroleum Engineering, University of Stavanger, 4036 Stavanger,  
Norway

<sup>2</sup>Beyond AS, Stokkamyrveien 30, 4313, Sandnes, Norway

<sup>3</sup>Department of Materials Science, Norwegian University of Science and Technology, 7491  
Trondheim, Norway

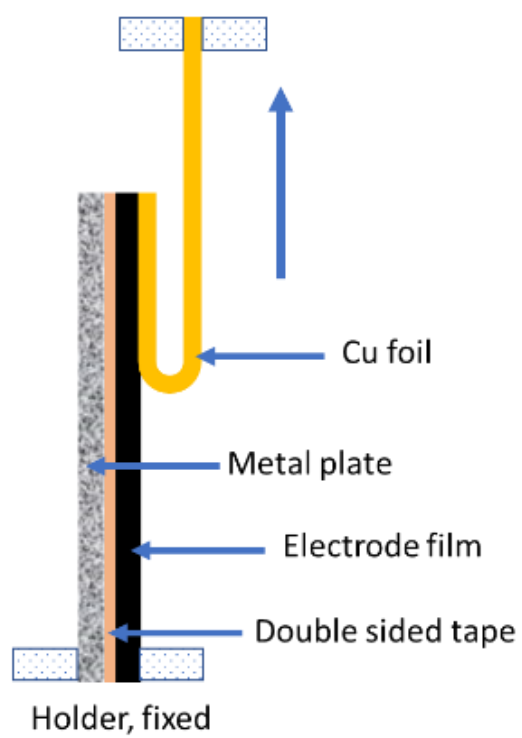

**Figure S1.** Graphical representation of peel-off strength test with tensile machine.

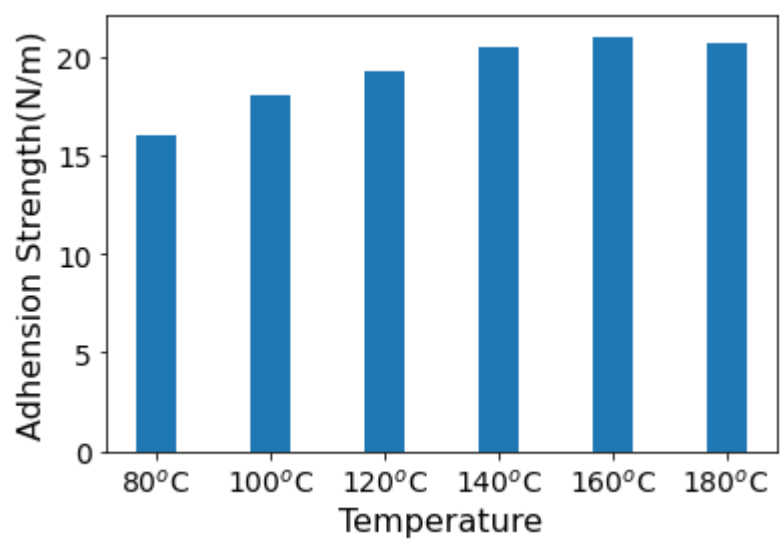

**Figure S2.** Adhesion strength at different lamination temperatures.

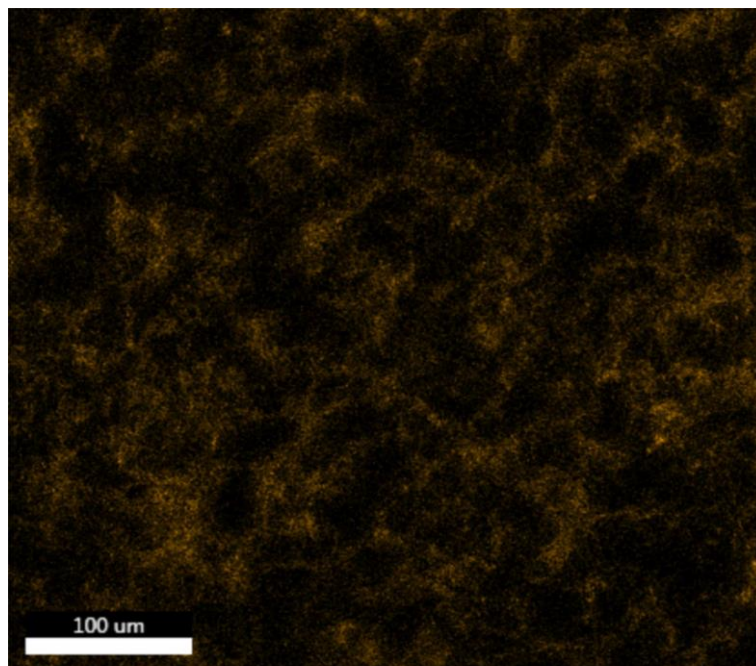

**Figure S3.** Fluorine element distribution on the surface of the pristine SF graphite anode from SEM-EDS mapping.

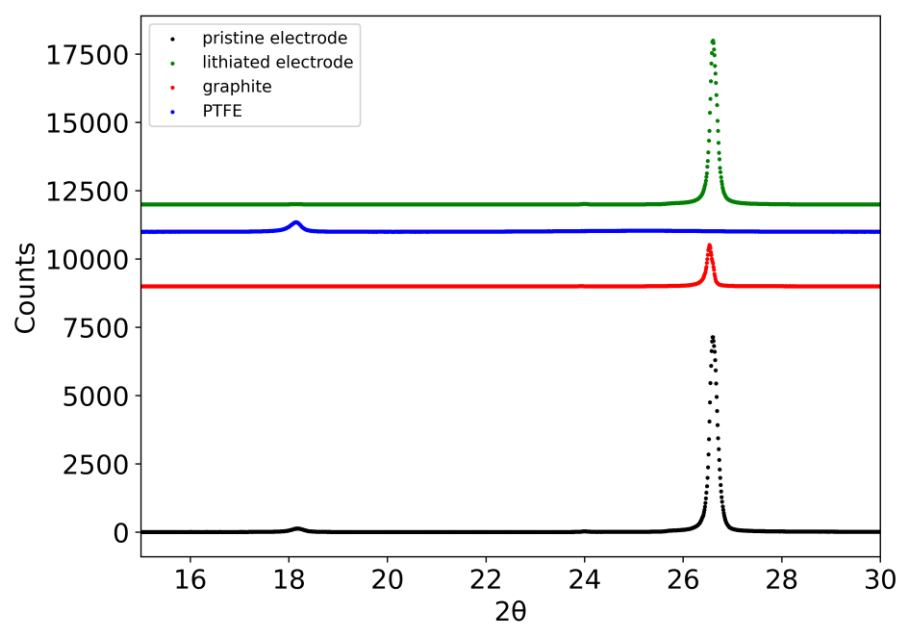

**Figure S4.** XRD characterization of pure PTFE powder, graphite powder, pristine SF graphite anode, and SF graphite anode after first lithiation.

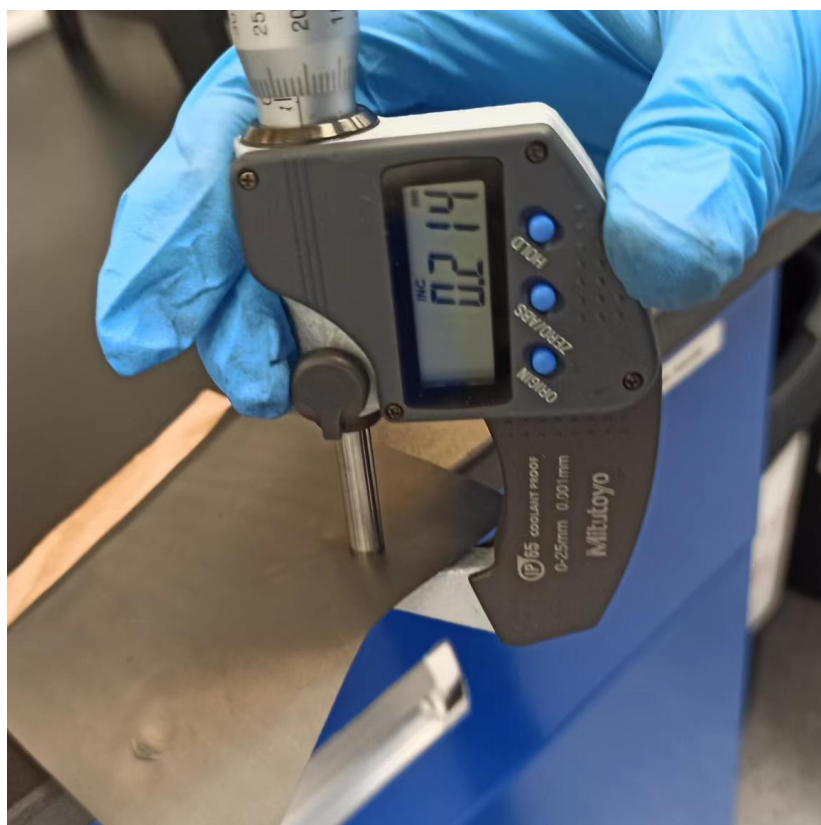

**Figure S5.** Hard carbon electrode with high loading of 25 mg/cm<sup>2</sup>.

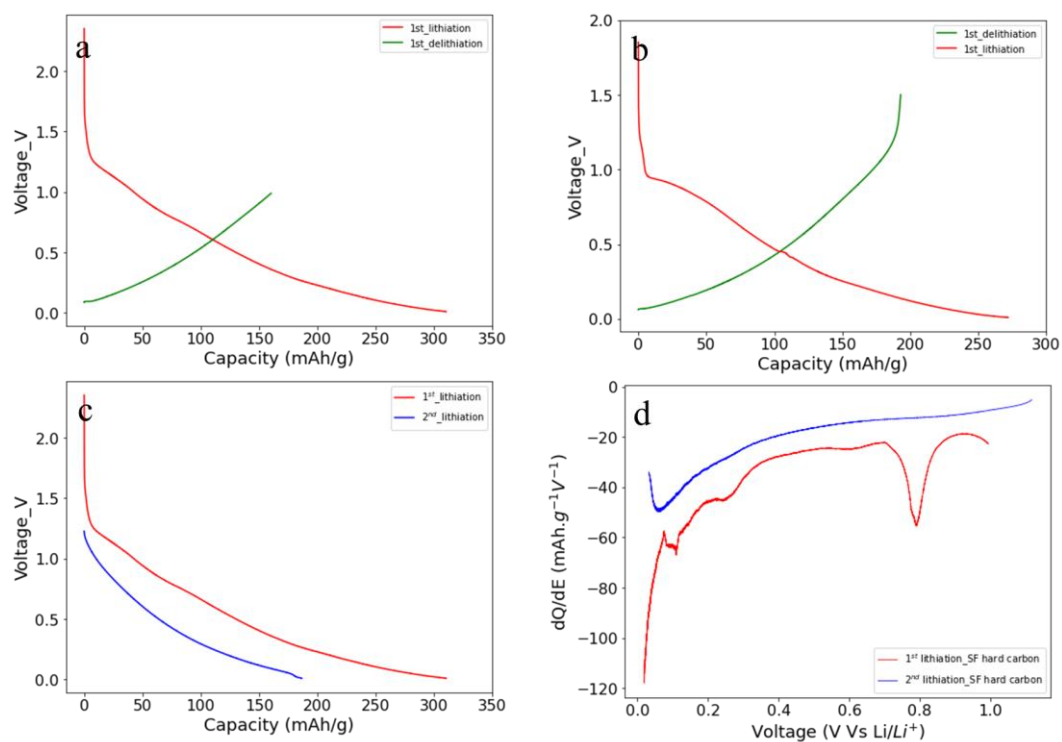

**Figure S6.** (a) First lithiation voltage-capacity curves for the SF hard carbon electrodes; (b) first lithiation voltage-capacity curves for the CSC hard carbon electrodes; (c) voltage-capacity curves for the SF hard carbon electrodes during the first and second cycles; (d) differential capacity curves for the SF hard carbon electrodes during the first and second cycles.

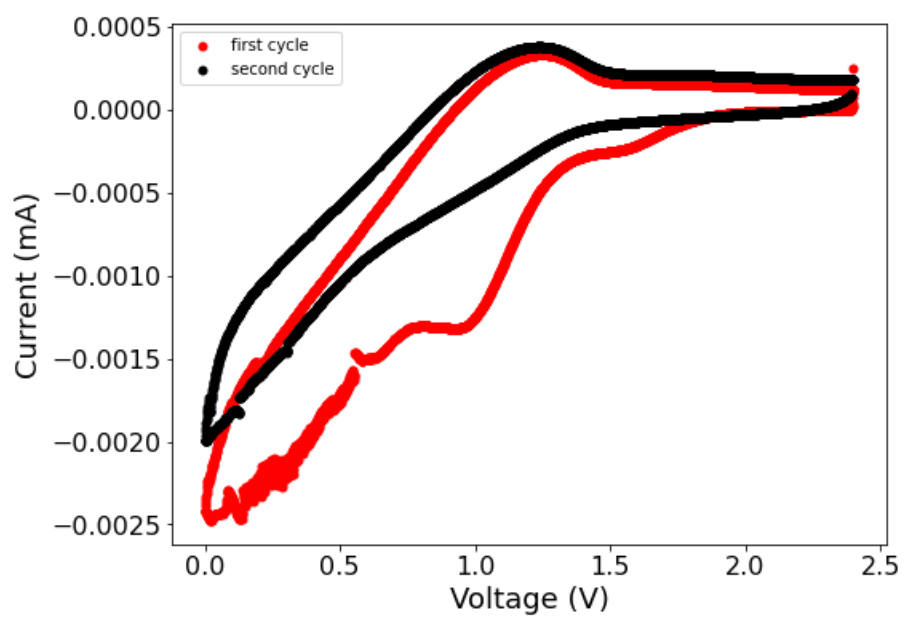

**Figure S7.** Cyclic voltammogram curves of PTFE electrodes scanned at 0.001 mV/s at the range of 0-2.4V.



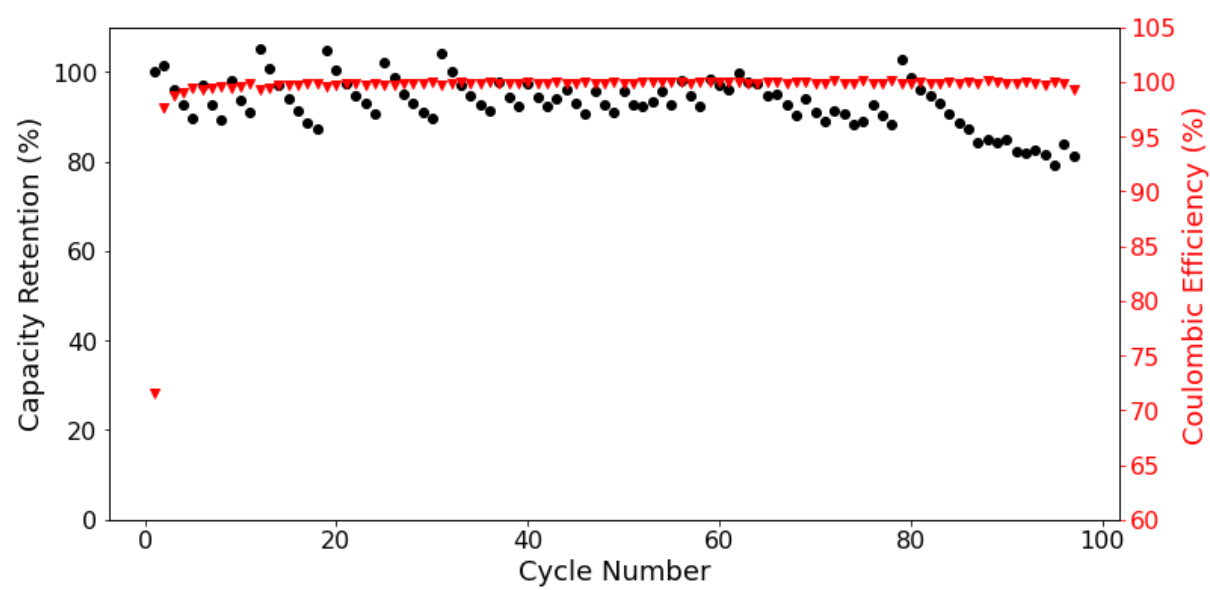

**Figure S8.** Capacity stability of SF soft carbon electrodes.

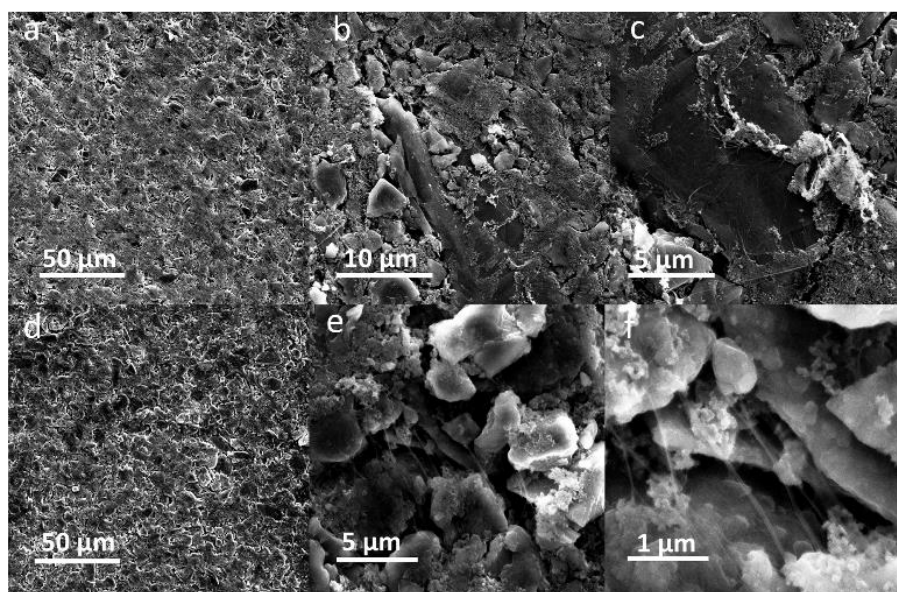

**Figure S9.** (a, b, c) SEM images of pristine SF soft carbon anodes; (d, e, f) SEM images of SF soft carbon electrodes after 100 cycles at different magnifications.

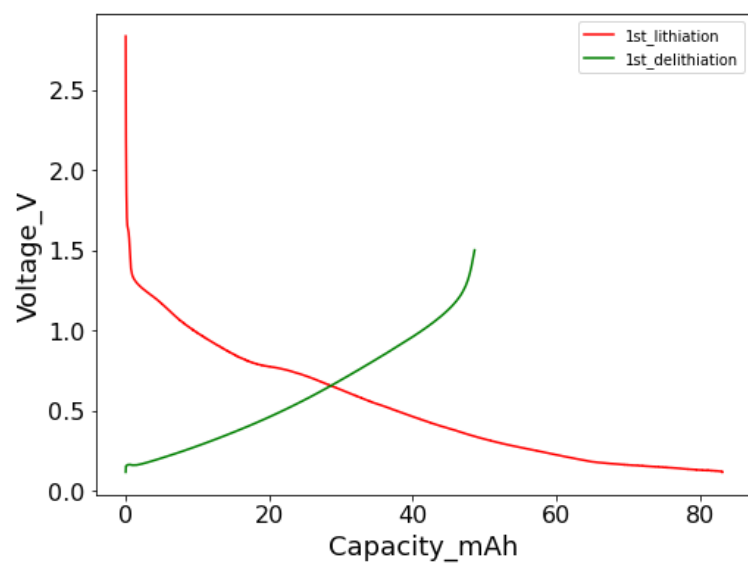

**Figure S10.** Voltage-capacity curves for the prelithiation process with lithium foil as lithium resource.
